# Supplementary material for: Applicability of surface-enhanced resonance Raman scattering for the direct discrimination of ballpoint pen inks
Source: Royal Society of Chemistry journal article supplement (doi:10.1039/b103042f), 2001-01-01
Supplement: figures.doc [file figures.doc]

**Supplementary Figure 1**

In situ SERRS spectra of blue ballpoint pen inks. Excitation wavelength, 514.5 nm. The numbers next to the spectra refer to Table 1.

**Supplementary Figure 2**

In situ 514.5 nm SERR spectra of spots obtained after TLC of blue ink No. 2; the spectrum of CV has been added as a reference. Rf = 0.57 is from CV present in ink. Separation conditions were as in Figure 3; Rf  values calculated from Figure 3.

**Supplementary Figure 3**

TLC of (1) SB38, (2) CV, (3) mixture of CV and SB38, (4) blue ink No. 9 on silica plate. For experimental conditions, see legend of Figure 3.

**Supplementary Figure 4**

TLC of (1) SB38, (2) CV, (3) mixture of CV-SB38, and (4) blue ink No. 9 on aluminium oxide plate. For experimental conditions, see legend of Figure 3.
